# Supplementary material for: Dysregulation of miRNAs Targeting the IGF-1R Pathway in Pancreatic Ductal Adenocarcinoma
Source: MDPI journal article supplement (doi:10.3390/cells10081856), 2021-07-22
Supplement: s1 [file s1]

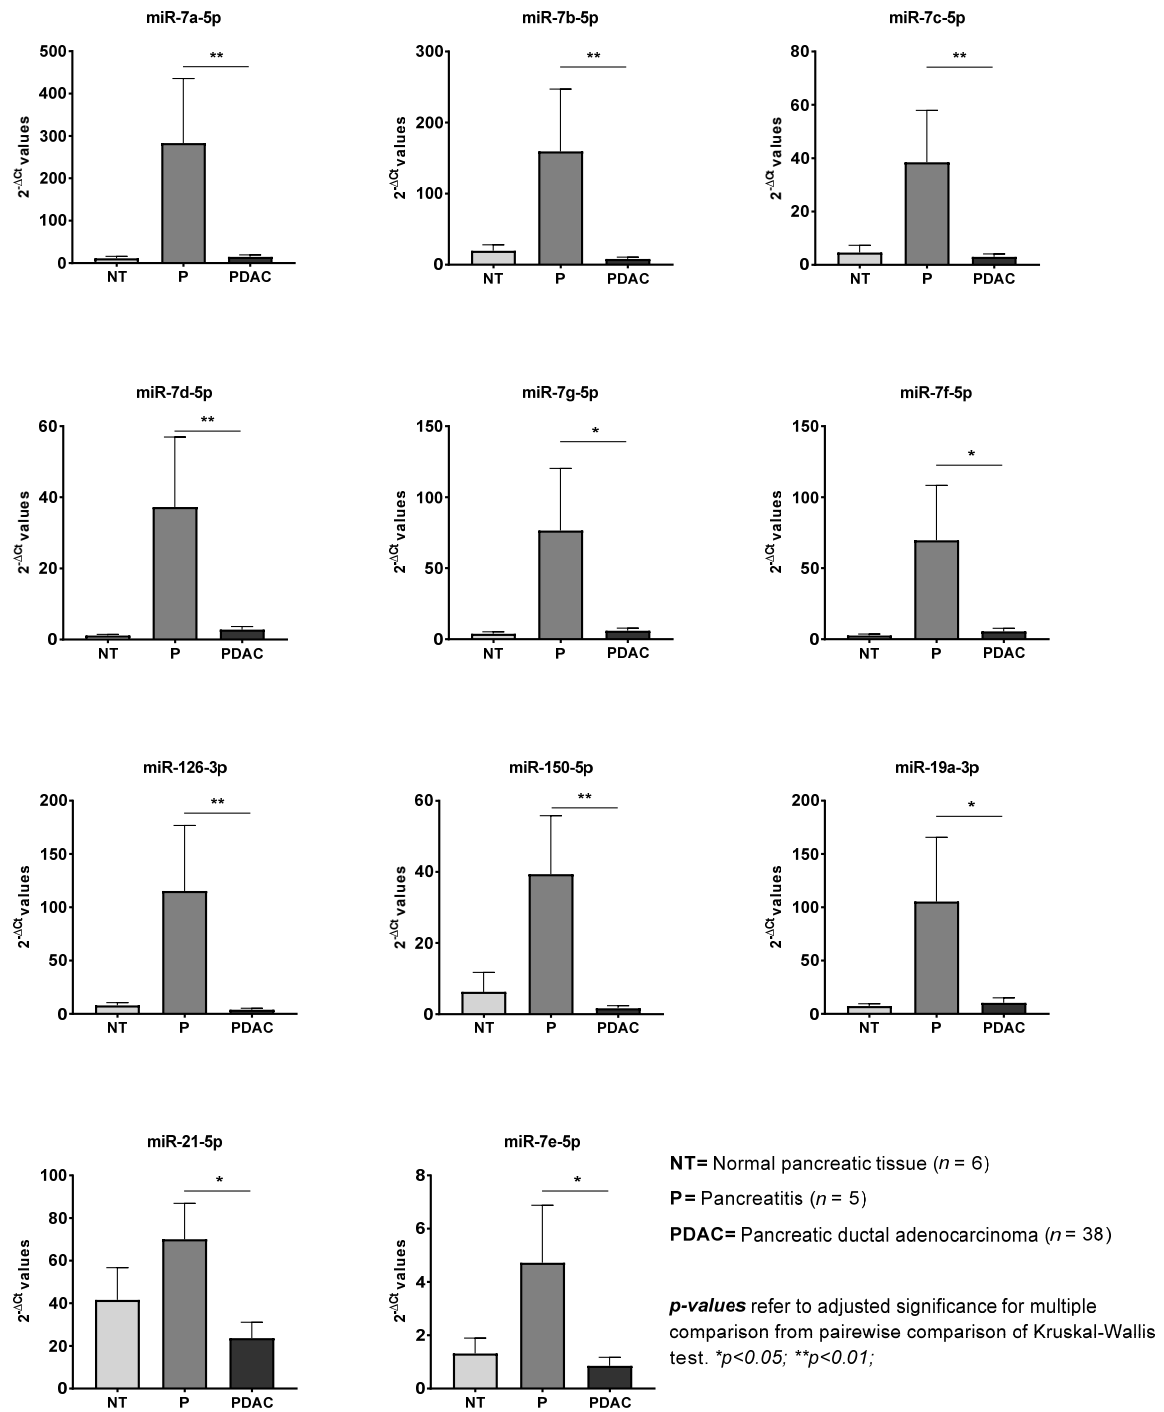

**Supplementary Figure 1:** Differential expression of miRNAs in pancreatic tissues from chronic pancreatitis (P), and pancreatic ductal adenocarcinoma (PDAC) groups. Values are shown as mean ± SEM.
